# Supplementary material for: Interleukin-2-regulatory T cell axis critically regulates maintenance of hematopoietic stem cells
Source: PubMed Central journal article supplement (PMC5444691; doi:10.18632/oncotarget.16377), 2017-03-18
Supplement: oncotarget-08-29625-s001.pdf [file oncotarget-08-29625-s001.pdf]

# Interleukin-2-regulatory T cell axis critically regulates maintenance of hematopoietic stem cells

## Supplementary Material

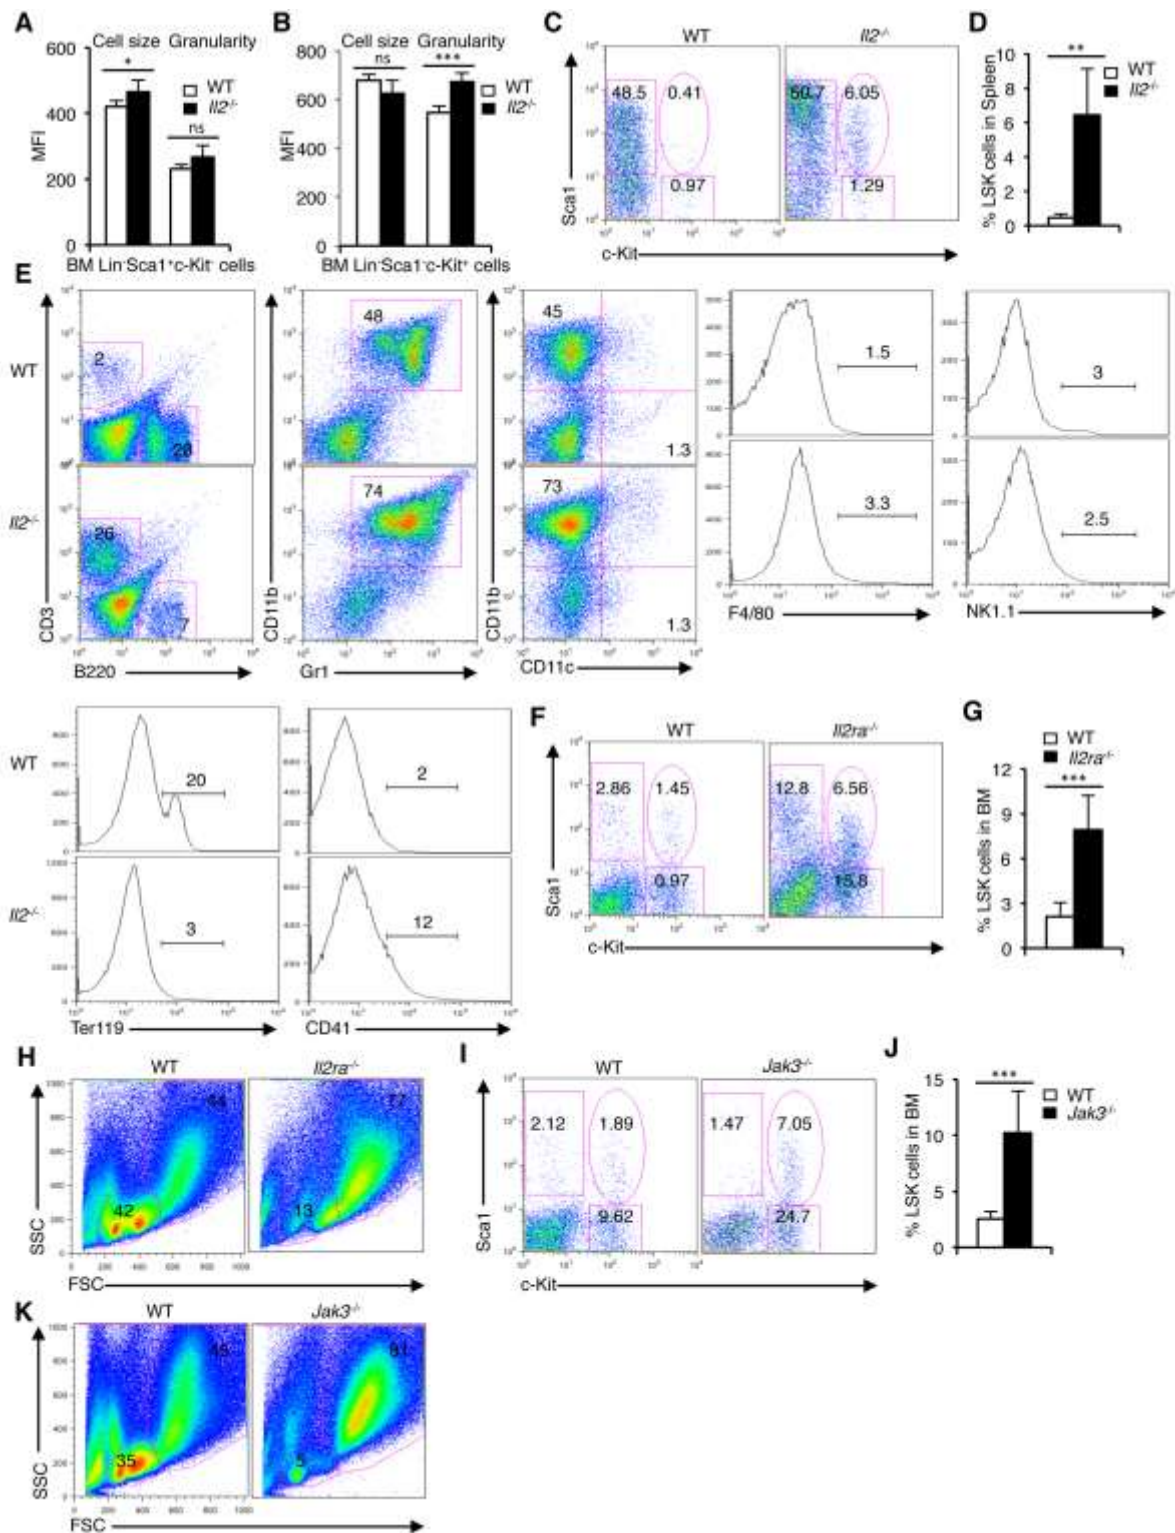

**Supplementary Figure 1: Impaired HSC maintenance in IL-2 signaling-deficient mice.**

**A.** Evaluation of cell size and granularity of BM Lin<sup>-</sup>Sca1<sup>+</sup>c-Kit<sup>-</sup> cells from WT and *Il2*<sup>-/-</sup> mice. **B.** Cell size and granularity of *Il2*<sup>-/-</sup> BM Lin<sup>-</sup>Sca1<sup>-</sup>c-Kit<sup>+</sup> cells compared to WT cells. **C.** Flow cytometry profiles of LSK cells distribution among splenocytes in *Il2*<sup>-/-</sup> mice compared to WT mice. **D.** Quantification of percent LSK cells in the spleen of WT and *Il2*<sup>-/-</sup> mice. **E.** Distribution of lymphoid (CD3<sup>+</sup>, B220<sup>+</sup> and NK1.1<sup>+</sup>), myeloid (Gr1<sup>+</sup>, CD11b<sup>+</sup>, CD11c<sup>+</sup> and F4/80<sup>+</sup>) and erythroid (Ter119<sup>+</sup> and CD41<sup>+</sup>) cells in the BM of *Il2*<sup>-/-</sup> mice compared to WT mice. **F.** Distribution of LSK cells in the BM of *Il2ra*<sup>-/-</sup> mice compared to littermate WT mice. **G.** Quantification of percent LSK cells in the BM of WT and *Il2ra*<sup>-/-</sup> mice. **H.** FSC/SSC distribution pattern of BM cells from *Il2ra*<sup>-/-</sup> mice compared to WT control mice. **I.** LSK cells distribution in the BM of *Jak3*<sup>-/-</sup> mice compared to littermate WT controls. **J.** Quantification of percent LSK cells in the BM of WT and *Jak3*<sup>-/-</sup> mice. **K.** FSC/SSC distribution pattern of BM cells in WT and *Jak3*<sup>-/-</sup> mice. Numbers inside each FACS plot represent percent respective population. Data are shown as mean ± s.d., in **(A)** \**P* = 0.0439, **(B)** \*\*\**P* = 0.0002, **(D)** \*\**P* < 0.0012, **(G)** \*\*\**P* < 0.0001 and in **(J)** \*\*\**P* = 0.0006, ns = not significant, unpaired *t*-test and are representative of 5 independent experiments, (*n* = 3 per group).

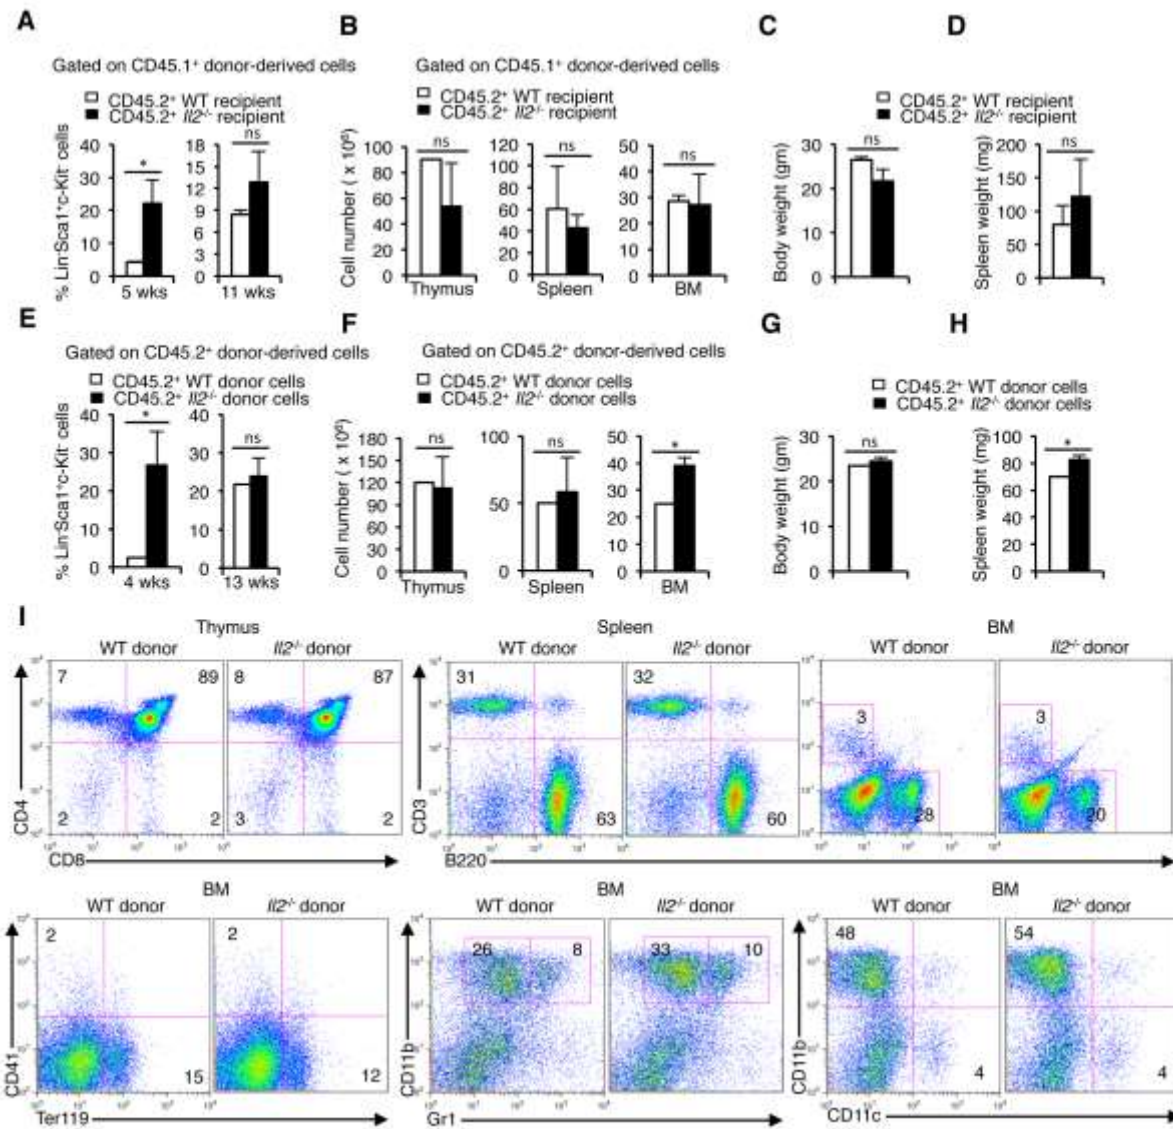

**Supplementary Figure 2: Impaired reconstitution potential of *Il2*<sup>-/-</sup> HSCs.** **A.** Evaluation of CD45.1<sup>+</sup> donor-derived BM Lin<sup>-</sup>Sca1<sup>+</sup>c-Kit<sup>-</sup> cells distribution in CD45.2<sup>+</sup> WT or *Il2*<sup>-/-</sup> recipient mice 5 or 11 weeks after cell transfer. **B.** Cellularity in the thymus, spleen and BM of irradiated CD45.2<sup>+</sup> WT or *Il2*<sup>-/-</sup> recipient mice 11 weeks after transfer of CD45.1<sup>+</sup> WT BM cells. **C.** Evaluation of body weight of irradiated CD45.2<sup>+</sup> WT or *Il2*<sup>-/-</sup> recipient mice 11 weeks after transfer of CD45.1<sup>+</sup> WT BM cells. **D.** Spleen weight in CD45.2<sup>+</sup> WT or *Il2*<sup>-/-</sup> recipient mice 11 weeks after transfer of CD45.1<sup>+</sup> WT BM cells. **E.** Evaluation of CD45.2<sup>+</sup> WT or *Il2*<sup>-/-</sup> donor-derived BM Lin<sup>-</sup>Sca1<sup>+</sup>c-Kit<sup>-</sup> cells distribution in CD45.1<sup>+</sup> WT recipient mice 4 or 13 weeks after cell transfer. **F.** Cellularity in the thymus, spleen and BM of

irradiated CD45.1<sup>+</sup> WT recipient mice 13 weeks after transfer of CD45.2<sup>+</sup> WT or *Il2*<sup>-/-</sup> BM cells. **G.** Evaluation of body weight of irradiated CD45.1<sup>+</sup> WT recipient mice 13 weeks after transfer of CD45.2<sup>+</sup> WT or *Il2*<sup>-/-</sup> BM cells. **H.** Spleen weight in CD45.1<sup>+</sup> WT recipient mice 13 weeks after transfer of CD45.2<sup>+</sup> WT or *Il2*<sup>-/-</sup> BM cells. **I.** Flow cytometry profiles of the distribution of various CD45.2<sup>+</sup> WT or *Il2*<sup>-/-</sup> donor-derived mature hematopoietic cell populations in the thymus, spleen and BM of CD45.1<sup>+</sup> WT recipient mice 13 weeks after cell transfer. Numbers inside each FACS plot represent percent respective population. Data are representative of two independent experiments, (*n* = 4 per group). Data are shown as mean ± s.d., in (A) \**P* = 0.0410, (E) \**P* = 0.0345, (f) \**P* = 0.0103, (H) \**P* = 0.0319, ns = not significant, unpaired *t*-test.

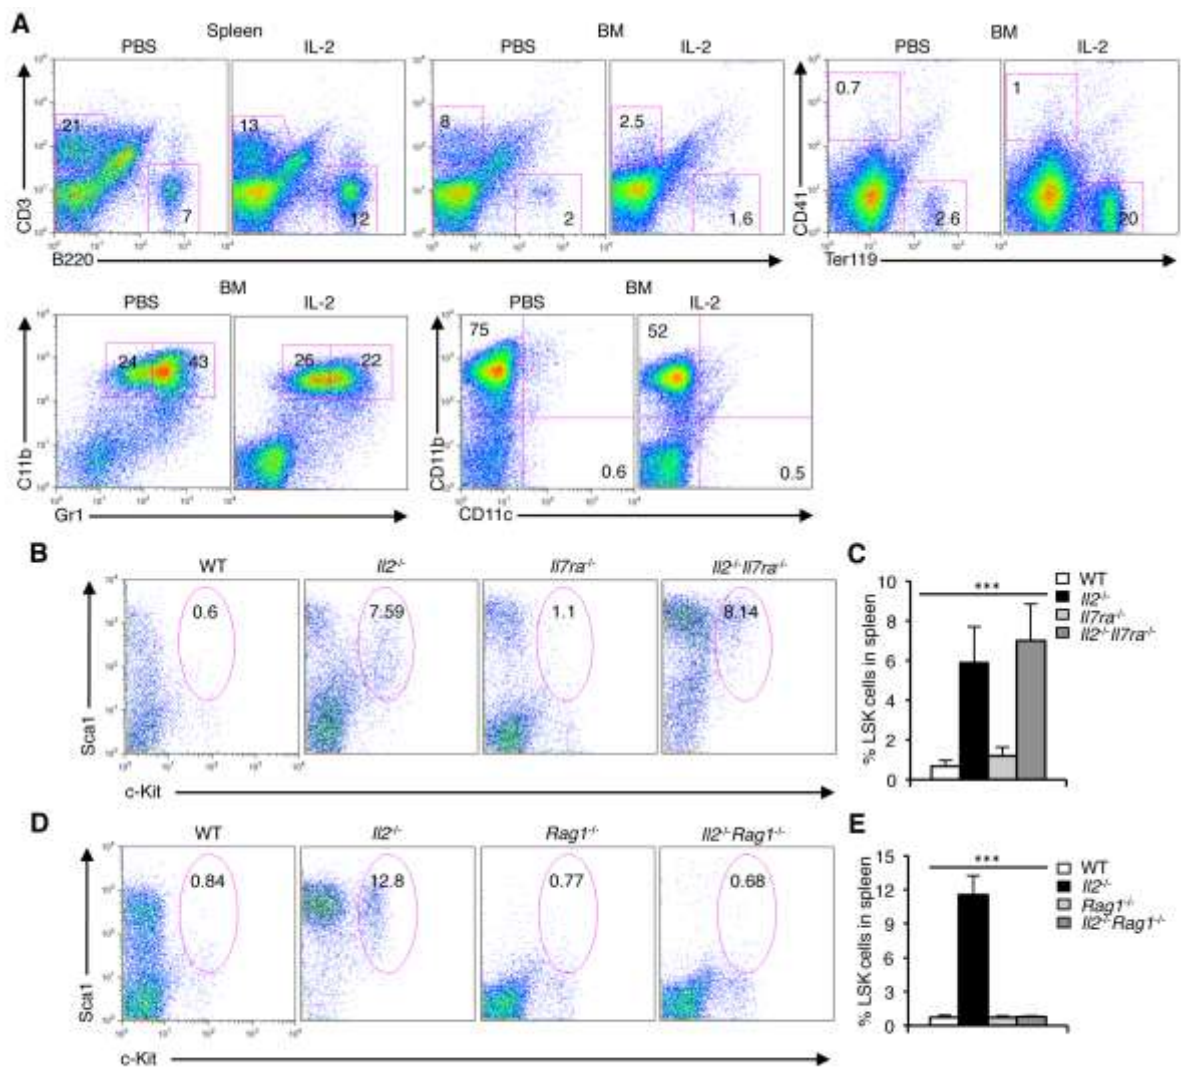

**Supplementary Figure 3: T cell activity in the BM influences LSK cell maintenance. A.**

Distribution of lymphoid ( $CD3^+$  and  $B220^+$ ), erythroid ( $Ter119^+$  and  $CD41^+$ ) and myeloid ( $Gr1^+$ ,  $CD11b^+$  and  $CD11c^+$ ) cells in the spleen and BM of PBS or IL-2 treated  $Il2^{-/-}$  mice. **B.**

Flow cytometry profiles showing the distribution of LSK cells in the spleen of  $Il2^{-/-}Il7ra^{-/-}$  mice compared to WT,  $Il2^{-/-}$  and  $Il7ra^{-/-}$  mice. **C.** Quantification of percent LSK population in the spleen of indicated mice. **D.** Flow cytometry profiles showing the distribution of LSK

cells in the spleen of  $Il2^{-/-}Rag1^{-/-}$  mice compared to WT,  $Il2^{-/-}$  and  $Rag1^{-/-}$  mice. **E.** Quantification of percent LSK population in the spleen of indicated mice. Numbers inside

each FACS plot represent percent respective population. Data are shown as mean  $\pm$  s.d.,  $***P < 0.0001$ , one-way ANOVA,  $n = 4$  per group, data represent one out of three independent

experiments.

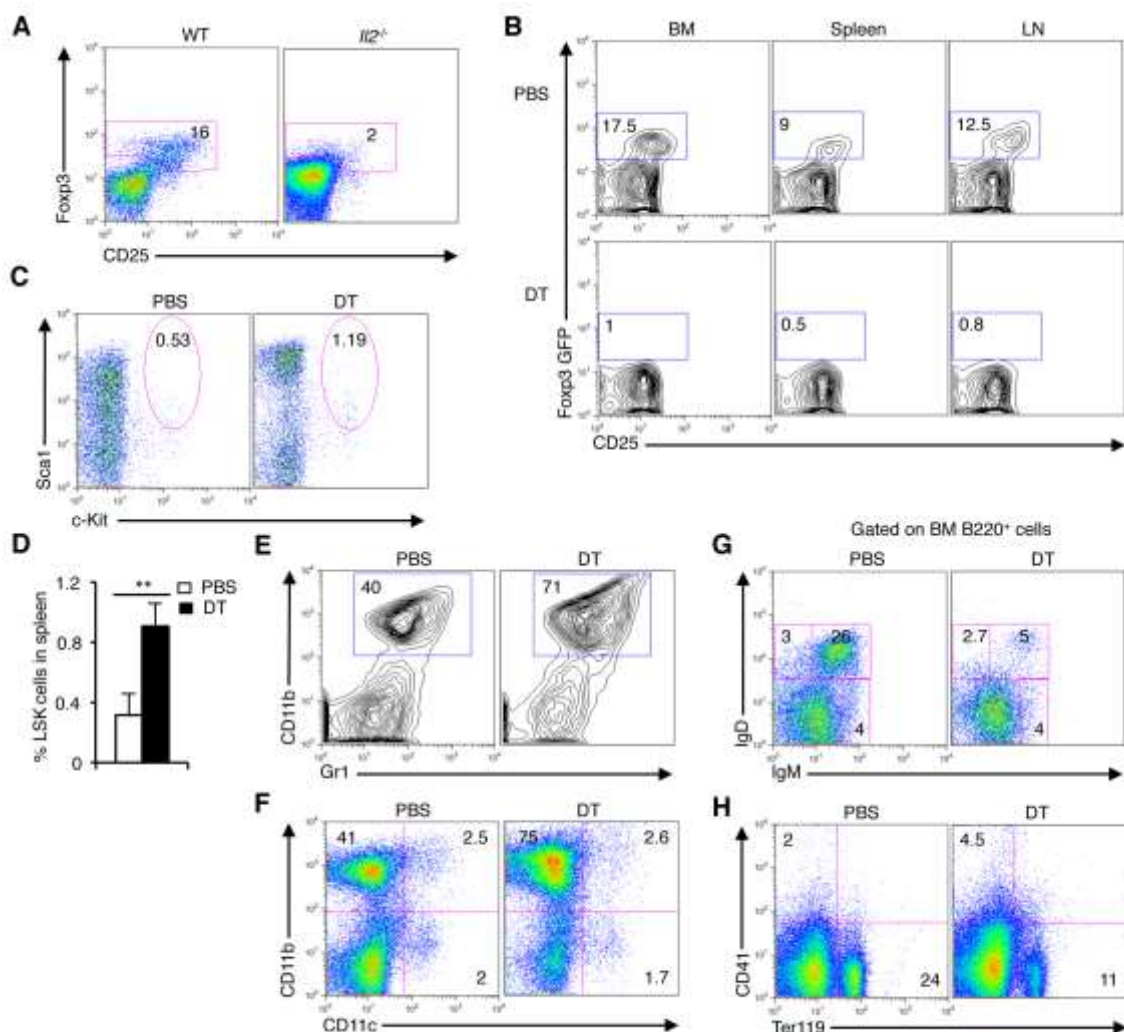

**Supplementary Figure 4: T<sub>reg</sub> cell activity is critical in maintaining BM hematopoiesis.**

**A.** Flow cytometry analysis of CD4<sup>+</sup>CD25<sup>+</sup>Foxp3<sup>+</sup> T<sub>reg</sub> cell population in the spleen of WT or *Il2*<sup>-/-</sup> mice. **B.** Analysis of the distribution of CD4<sup>+</sup>CD25<sup>+</sup>Foxp3<sup>+</sup> T<sub>reg</sub> cell population in the BM, spleen and LNs of PBS or DT treated DERE<sub>G</sub> mice. **C.** Distribution of LSK cells in the spleen of PBS or DT treated DERE<sub>G</sub> mice. **D.** Quantification of percent LSK population in the spleen of PBS or DT treated DERE<sub>G</sub> mice. **E-H.** Distribution of CD11b<sup>+</sup> and Gr1<sup>+</sup> cells (**E**), CD11b<sup>+</sup> and CD11c<sup>+</sup> cells (**F**), IgM<sup>+</sup> and IgD<sup>+</sup> cells (**G**), and Ter119<sup>+</sup> and CD41<sup>+</sup> cells (**H**) in the BM of DERE<sub>G</sub> mice treated with PBS or DT. Numbers inside each FACS plot represent percent respective population. Data are shown as mean ± s.d., \*\**P* = 0.0013, unpaired *t*-test, *n* = 4 per group, data represent one out of three independent experiments.

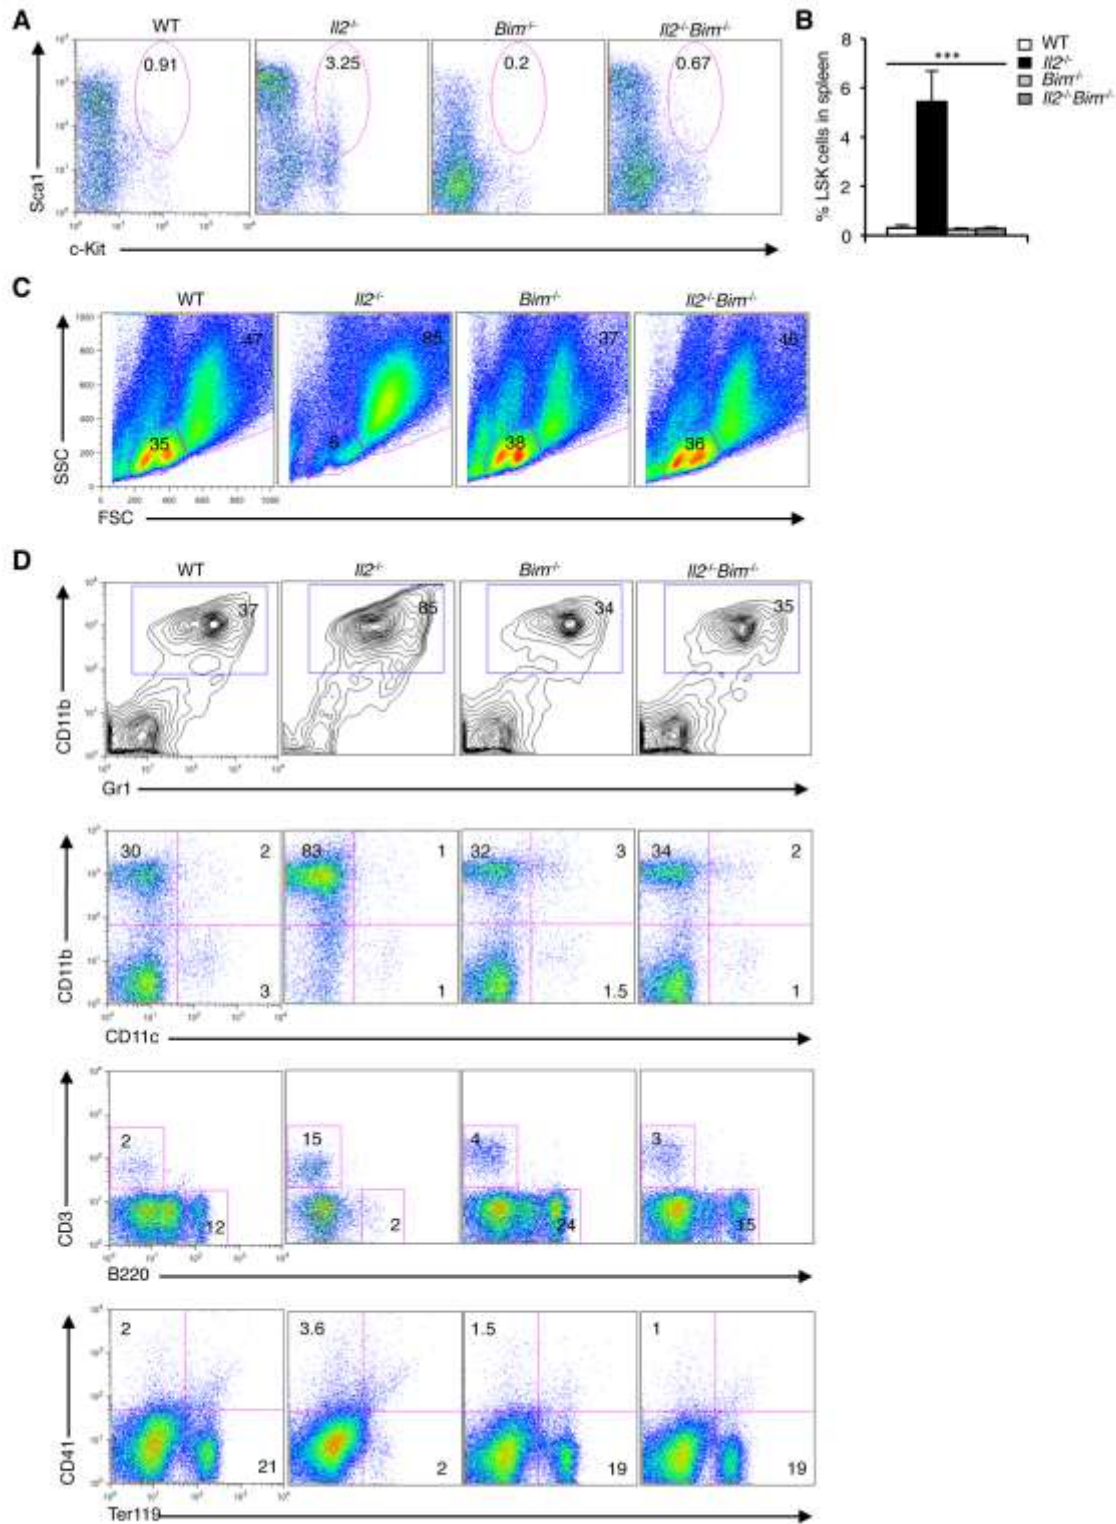

**Supplementary Figure 5: Restoration of T<sub>reg</sub> cells reverses hematopoietic defects in *Il2*<sup>-/-</sup> mice.** **A.** Distribution of LSK cells in the spleen of *Il2*<sup>-/-</sup>*Bim*<sup>-/-</sup> mice compared to WT, *Il2*<sup>-/-</sup> and *Bim*<sup>-/-</sup> mice as revealed by flow cytometry. **B.** Quantification of percent LSK population in the

spleen of indicated mice. **C.** Profiles of BM cells according to their FSC/SSC distribution pattern in *Il2<sup>-/-</sup>Bim<sup>-/-</sup>* mice compared to WT, *Il2<sup>-/-</sup>* and *Bim<sup>-/-</sup>* mice. **D.** Distribution of myeloid ( $\text{Gr1}^+$ ,  $\text{CD11b}^+$  and  $\text{CD11c}^+$ ), lymphoid ( $\text{CD3}^+$  and  $\text{B220}^+$ ), and erythroid ( $\text{Ter119}^+$  and  $\text{CD41}^+$ ) cells in the BM of *Il2<sup>-/-</sup>Bim<sup>-/-</sup>* mice compared to littermate control mice. Numbers inside each FACS plot represent percent respective population. Data are shown as mean  $\pm$  s.d., \*\*\* $P < 0.0001$ , one-way ANOVA,  $n = 4$  per group, data represent one out of three independent experiments.

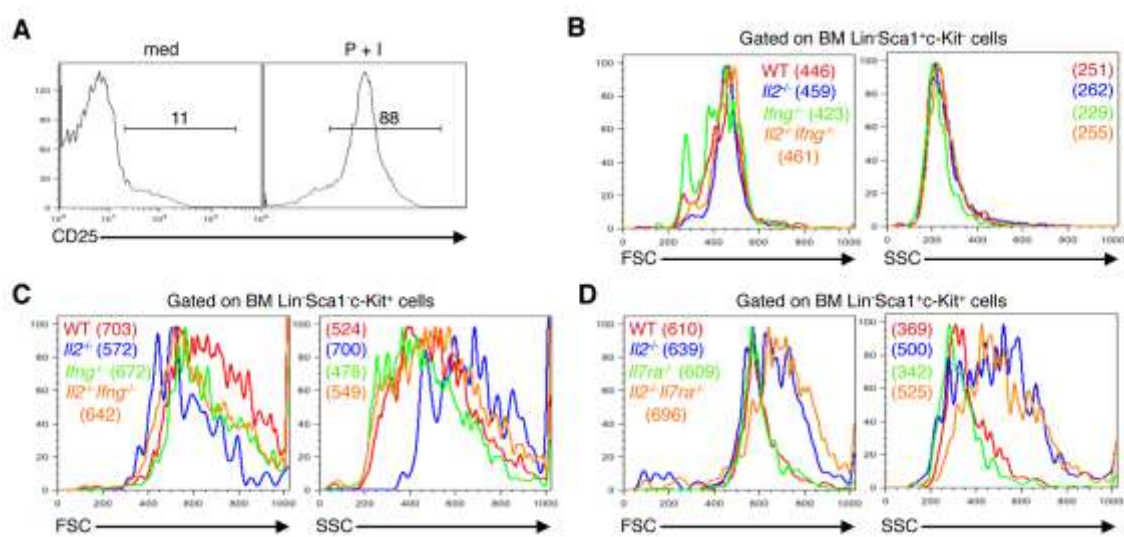

**Supplementary Figure 6: IFN- $\gamma$  deficiency reverses HSC defects in *Il2<sup>-/-</sup>* mice.** **A.** Flow cytometry profiles of CD25 expression in WT  $\text{CD4}^+$  T cells either left unstimulated or stimulated for 6 h with P+I. **B.** FSC, and SSC profiles of BM  $\text{Lin}^- \text{Sca1}^+ \text{c-Kit}^-$  cells from *Il2<sup>-/-</sup> Ifng<sup>-/-</sup>* mice compared to WT, *Il2<sup>-/-</sup>* and *Ifng<sup>-/-</sup>* mice. **C.** FSC, and SSC profiles of BM  $\text{Lin}^- \text{Sca1}^+ \text{c-Kit}^+$  cells from *Il2<sup>-/-</sup> Ifng<sup>-/-</sup>* mice compared to WT, *Il2<sup>-/-</sup>* and *Ifng<sup>-/-</sup>* mice. **D.** Profile of BM LSK cells from *Il2<sup>-/-</sup> Il7ra<sup>-/-</sup>* mice according to their FSC, and SSC distribution pattern compared to that from littermate WT, *Il2<sup>-/-</sup>* and *Il7ra<sup>-/-</sup>* mice. Numbers inside the histograms in **(A)** represent percent respective population, and in the histograms in **(B-D)** represent MFI. Data represent one out of three independent experiments,  $n = 4$  per group.



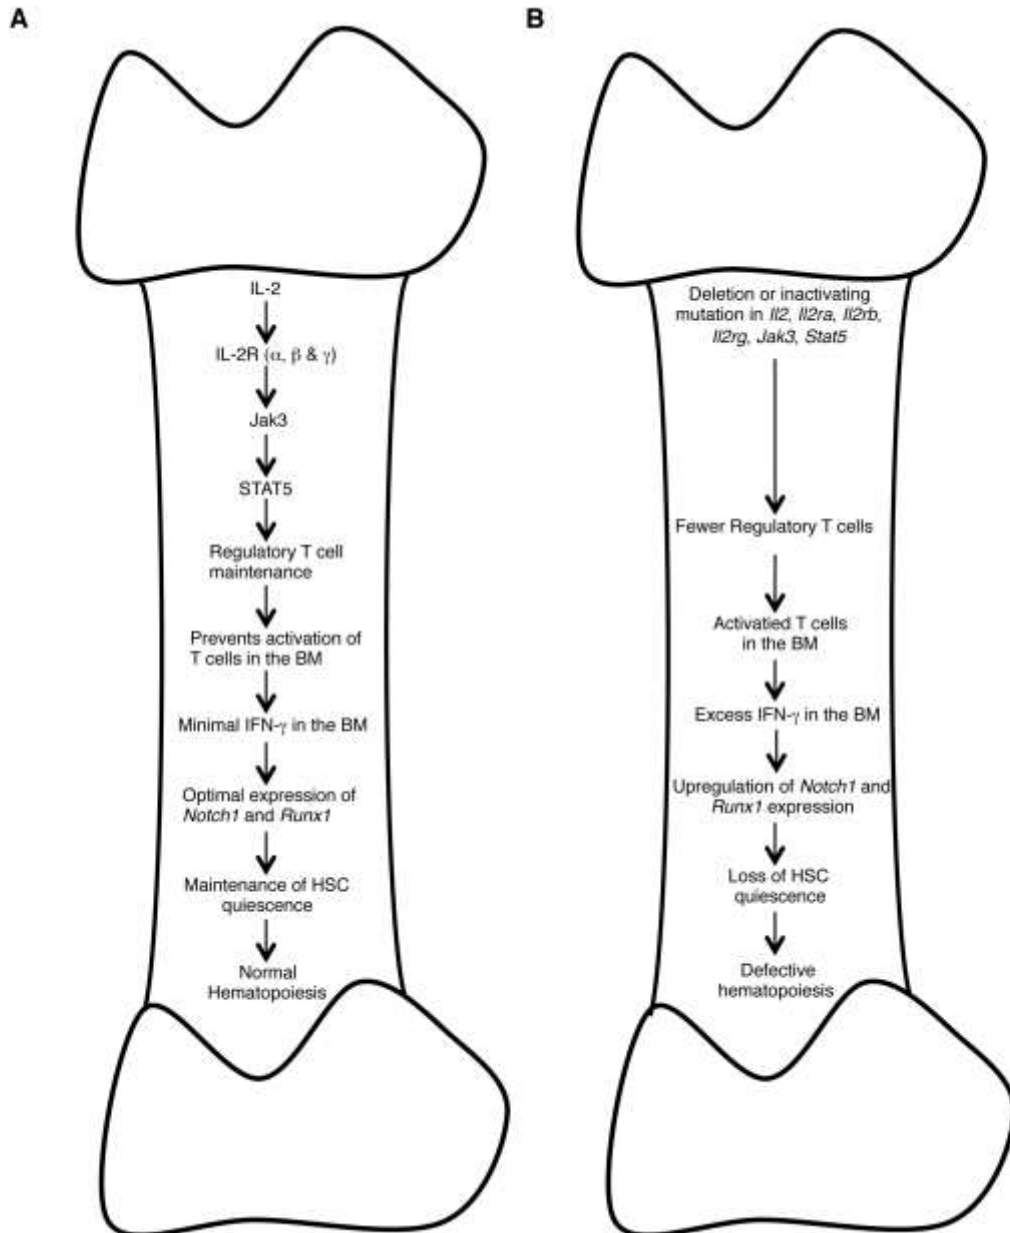

**Supplementary Figure 7: IL-2-dependent T<sub>reg</sub> cell activity is essential for BM hematopoiesis. A.** Scheme showing the essentiality of IL-2 signaling on the maintenance of HSCs in the bone marrow. **B.** Schematic representation of the effects of deficiency in IL-2 or any of the components of IL-2 signaling pathway on HSC maintenance and hematopoiesis in the bone marrow.

**Supplementary Table 1**  
**LIST OF RT-PCR PRIMERS**

| <b>Gene</b>   | <b>Primer Sequence</b>                                                     | <b>Product Size</b> |
|---------------|----------------------------------------------------------------------------|---------------------|
| <i>Actb</i>   | For: 5'-CCAGGTCATCACTATTGGCAAGGA-3'<br>Rev: 5'-GAGCAGTAATCTCCTTCTGCATCC-3' | 223 bp              |
| <i>Bcl2</i>   | For: 5'-GGTGGTGGAGGAACTCTTCA-3'<br>Rev: 5'-CTCACTTGTGGCCCAGGTAT-3'         | 326 bp              |
| <i>Bcl2l1</i> | For: 5'-TTCGGGATGGAGTAAACTGG-3'<br>Rev: 5'-TGTCTGGTCACTTCCGACTG-3'         | 318 bp              |
| <i>Bmi1</i>   | For: 5'-TGTCCTGTGTGGAGGGTACT-3'<br>Rev: 5'-CAACTTCTCCTCGGTCTTCA-3'         | 299 bp              |
| <i>Cdkn1b</i> | For: 5'-GCTCTGCTCCATTTGACTGT-3'<br>Rev: 5'-GTCCCGGGTTAGTTCTTCAT-3'         | 293 bp              |
| <i>Cebpa</i>  | For: 5'-GGTGGACAAGAACAGCAACGAG-3'<br>Rev: 5'-TAGAGATCCAGCGACCCGAAAC-3'     | 325 bp              |
| <i>Csf1</i>   | For: 5'-AGTCTGTCTTCCACCTGCTG-3'<br>Rev: 5'-TGGTAGTGGTAGGCCACATT-3'         | 299 bp              |
| <i>Csf1r</i>  | For: 5'-ATGAGTCCCTCTTCACTCCG-3'<br>Rev: 5'-ACCTTCAGCACTGCATCTTC-3'         | 306 bp              |
| <i>Csf2ra</i> | For: 5'-CCTGCTCTTCTCCACGCTAC-3'<br>Rev: 5'-ACTCCCCAGCAGTGACAAGT-3'         | 541 bp              |
| <i>Csf3r</i>  | For: 5'-AACTACACCCAGGCCTTCT-3'<br>Rev: 5'-GAGCTCAAACCTGGTCCTTGC-3'         | 606 bp              |
| <i>Cxcr4</i>  | For: 5'-GTGGATGGTGGTGTTCAT-3'<br>Rev: 5'-CTCGAAGTCACATCCTTGCT-3'           | 254 bp              |
| <i>Egr2</i>   | For: 5'-CTCCCATCTCTGCACCTAGA-3'<br>Rev: 5'-ATAAGGAGGAGGAGGTGGTG-3'         | 284 bp              |
| <i>Epor</i>   | For: 5'-GGACACCTACTTGGTATTGG-3'<br>Rev: 5'-GACGTTGTAGGCTGGAGTCC-3'         | 452 bp              |
| <i>Flk2</i>   | For: 5'-GACAAATCTCCCAATTGCAC-3'<br>Rev: 5'-GTGGCAGATCAACACAATGA-3'         | 291 bp              |
| <i>Gata1</i>  | For: 5'-ATTCCTGGGGGCTCACCTTATG-3'<br>Rev: 5'-TCCACAGTTCACACACTCTCTGGC-3'   | 366 bp              |
| <i>Gata2</i>  | For: 5'-AGCAAGGCTCGTTCCTGTTCAG-3'<br>Rev: 5'-CCATAAGGTGGTGGTTGTCGTC-3'     | 231 bp              |
| <i>Gfi1</i>   | For: 5'-GAGCTTCAAGAGGTCATCCA-3'<br>Rev: 5'-AGTCCATGCTGAGTCTCTCG-3'         | 306 bp              |
| <i>Hax1</i>   | For: 5'-GATGACGACGATGATGATGA-3'<br>Rev: 5'-CTGGGTTGGTGA CTATCTGG-3'        | 330 bp              |
| <i>Hoxa9</i>  | For: 5'-TCACCAACCAAACACAACAG-3'<br>Rev: 5'-CACAAATTAATCACGCCATCA-3'        | 299 bp              |
| <i>Hoxb4</i>  | For: 5'-TCACTCCCTTCCACCATAGA-3'<br>Rev: 5'-ATAACAACGGGAGAGGGTTC-3'         | 342 bp              |

|                 |                                                                        |        |
|-----------------|------------------------------------------------------------------------|--------|
| <i>Ifng</i>     | For: 5'-CAATGAACGCTACACACTGC-3'<br>Rev: 5'-CGCTTATGTTGTTGCTGATG-3'     | 279 bp |
| <i>Il2</i>      | For: 5'-CCCTTGCTAATCACTCCTCA-3'<br>Rev: 5'-TTCCAATTGAAAGCTTTTGC-3'     | 392 bp |
| <i>Il3ra</i>    | For: 5'-GCCCTGCATGGACAACACT-3'<br>Rev: 5'-GCACCGTAGCCACTGAAGTCA-3'     | 423 bp |
| <i>Il4</i>      | For: 5'-GACGGCACAGAGCTATTGAT-3'<br>Rev: 5'-AAAATATGCGAAGCACCTTG-3'     | 253 bp |
| <i>Il10</i>     | For: 5'-GGACCAGCTGGACAACATAC-3'<br>Rev: 5'-CACTCTTCACCTGCTCCACT-3'     | 263 bp |
| <i>Il12b</i>    | For: 5'-TGTCTGCAGAGAAGGTCACA-3'<br>Rev: 5'-CAAAGGCTTCATCTGCAAGT-3'     | 218 bp |
| <i>Il23a</i>    | For: 5'-GATCTGAGAAGCAGGGAACA-3'<br>Rev: 5'-CAGAACTGGCTGTTGTCCTT-3'     | 291 bp |
| <i>Klf1</i>     | For: 5'-GATCGCCGGAGACGCAGGCT-3'<br>Rev: 5'-TCCCCAGTCCTTGTGCAGGA-3'     | 363 bp |
| <i>Lef1</i>     | For: 5'-CCAGACTGTCTCCACAGCTT-3'<br>Rev: 5'-TGACAGGTCAGCACAGAAGA-3'     | 288 bp |
| <i>Mpl</i>      | For: 5'-GAAATCTGCCTGCTGTGACT-3'<br>Rev: 5'-GAACCAGGAAGGAAGGTGAT-3'     | 254 bp |
| <i>Meis1</i>    | For: 5'-AATGCCTATCGATTTGGTGA-3'<br>Rev: 5'-CCTTATCAGGGTCATCATCG-3'     | 266 bp |
| <i>Myc</i>      | For: 5'-CATCCTGTCCATTCAAGC-3'<br>Rev: 5'-TAATTCCAGCGCATCAGT-3'         | 200 bp |
| <i>Nfe2</i>     | For: 5'-GAGCCCTGGCCATGAAGATTCC-3'<br>Rev: 5'-CACCATCAGCAGCCTGTTGCAG-3' | 391 bp |
| <i>Notch1</i>   | For: 5'-TTGACGTCCTCTCCTGTGC-3'<br>Rev: 5'-ACACAGGTGCCATTGTTGAA-3'      | 408 bp |
| <i>Notch2</i>   | For: 5'-ACCCTTGTATGCACGGAGTC-3'<br>Rev: 5'-CCAGGTTATTGCACGTTCCCT-3'    | 373 bp |
| <i>Pbx1</i>     | For: 5'-AAACTGCCACAGAATGAAGC-3'<br>Rev: 5'-CTTCTCCAGCTCTGTGTGGT-3'     | 298 bp |
| <i>Pu.1</i>     | For: 5'-CGGATGACTTGGTTACTTACG-3'<br>Rev: 5'-GTAGGAAACCTGGTGACTGAG-3'   | 292 bp |
| <i>Runx1</i>    | For: 5'-GAGGCAAACCTCTGTCCTGAA-3'<br>Rev: 5'-TTAGGCCTCAAAGACACCTG-3'    | 312 bp |
| <i>Scl</i>      | For: 5'-TTCTACAGGACGTGCTTTCC-3'<br>Rev: 5'-GAAACAGAAATGCCAGCCTA-3'     | 324 bp |
| <i>Slamf1</i>   | For: 5'-TCCATGCCTCAGTTTCTCTC-3'<br>Rev: 5'-GGCAACTTTACAGCAGCATT-3'     | 264 bp |
| <i>Tel/Etv6</i> | For: 5'-TAAACACAGTTTGGCCATT-3'<br>Rev: 5'-AACGCACAGCAGCTCTAACT-3'      | 273 bp |
| <i>Tgfb</i>     | For: 5'-GCTTCAGCTCCACAGAGAAG-3'<br>Rev: 5'-CGTAGTAGACGATGGGCAGT-3'     | 255 bp |
| <i>Tnf</i>      | For: 5'-TGGGTGTTTCATCCATTCTCT-3'<br>Rev: 5'-TTTGAGTCCTTGATGGTGGT-3'    | 232 bp |
| <i>Trp53</i>    | For: 5'-CAGGGCTGAGACACAATC-3'<br>Rev: 5'-TGGGGTAGGGTGAGATTT-3'         | 201 bp |
